# Supplementary material
Source: MDPI journal article supplement (https://www.mdpi.com/search?q=biomolecules-11-00481)
Supplement: s001 [file biomolecules-11-00481-s001.pdf]

Article

# MRAP2 Interaction with Melanocortin-4 Receptor in Snakehead (*Channa argus*)

Zheng-Yong Wen<sup>1,2,3,\*†</sup>, Ting Liu<sup>4†</sup>, Chuan-Jie Qin<sup>1,2</sup>, Yuan-Chao Zou<sup>1,2</sup>, Jun Wang<sup>1,2</sup>, Rui Li<sup>1,2</sup> and Ya-Xiong Tao<sup>4,\*</sup>

**Citation:** Wen, Z.-Y.; Liu, T.; Qin, C.-J.; Zou, Y.-C.; Wang, J.; Li, R.; Tao, Y.-X. MRAP2 Interaction with Melanocortin-4 Receptor in Snakehead (*Channa argus*). **2021**, *11*, 481. <https://doi.org/10.3390/biom11030481>

- <sup>1</sup> Key Laboratory of Sichuan Province for Fish Conservation and Utilization in the Upper Reaches of the Yangtze River, Neijiang Normal University, Neijiang, Sichuan 641100, China; qinchuanjie@126.com (C.-J.Q.); zou3891@163.com (Y.-C.Z.); wangjunzl@126.com (J.W.); liruitiandi@sina.com (R.L.)
- <sup>2</sup> College of Life Science, Neijiang Normal University, Neijiang, Sichuan 641100, China; qinchuanjie@126.com (C.-J.Q.); zou3891@163.com (Y.-C.Z.); wangjunzl@126.com (J.W.); liruitiandi@sina.com (R.L.)
- <sup>3</sup> BGI Education Center, University of Chinese Academy of Sciences, Shenzhen 518083, China
- <sup>4</sup> Department of Anatomy, Physiology and Pharmacology, College of Veterinary Medicine, Auburn University, Auburn, AL 36849, United States; tzl0057@auburn.edu (T.L.)
- † These authors contributed equally.
- \* Correspondence: zhengyong\_wen@126.com; Tel.: +86 18582681220 (Z.Y.W.); taoyaxi@auburn.edu; Tel.: +1 3348445396 (Y.X.T.)

Academic Editor: Paolo Annibale

Received: 26 January 2021

Accepted: 19 March 2021

Published: 23 March 2021

**Publisher's Note:** MDPI stays neutral with regard to jurisdictional claims in published maps and institutional affiliations.

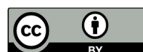

**Copyright:** © 2021 by the authors. Licensee MDPI, Basel, Switzerland. This article is an open access article distributed under the terms and conditions of the Creative Commons Attribution (CC BY) license (<http://creativecommons.org/licenses/by/4.0/>).

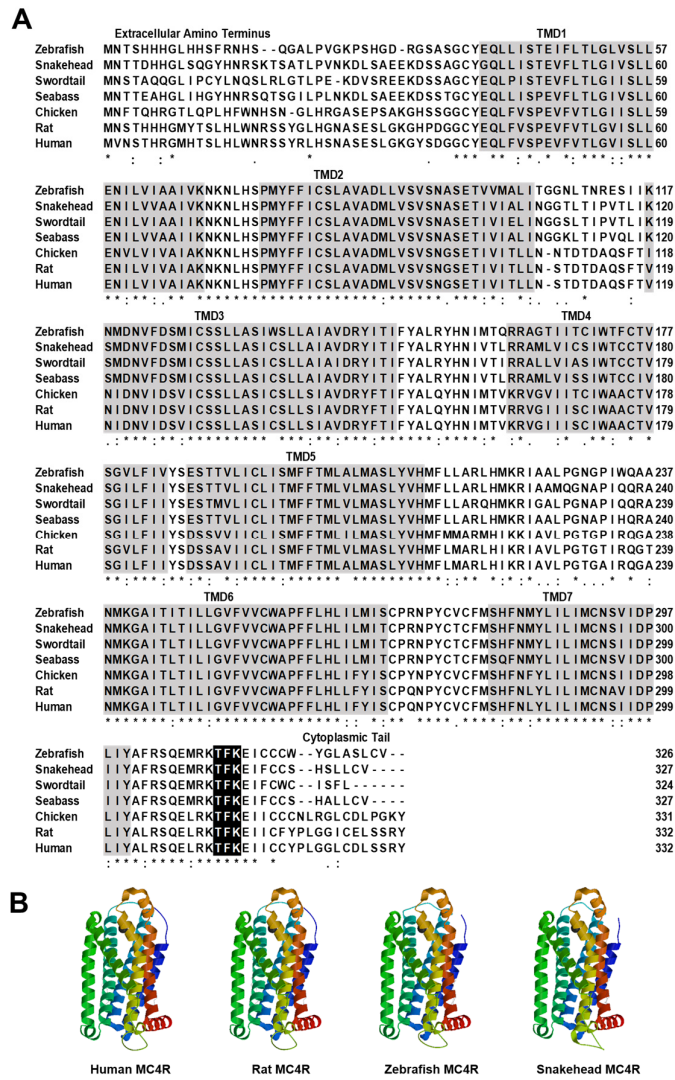

**Figure S1.** Comparison of amino acid sequences between caMC4R and MC4Rs from other species (A) and the putative three-dimensional structure of snakehead MC4R and those of relative model species (B). Labeled as follows: trans-membrane domains were shown in shaded boxes and named as TMD 1-7, amino and carboxyl termini were represented as extracellular amino terminus and cytoplasmic tail, respectively. Predicted phosphorylation sites were shown by dark shadow. Asterisk (\*) indicated the same amino acids. Cellular was shown by a green frame box, followed an extracellular N-terminus and intracellular C-terminus, respectively. Seven transmembrane domains were shown in the figure. Amino acid was represented by a circular round.



**Table S1.** PCR primers used for cloning and gene expression studies.

| <b>Primers</b>    | <b>Primer sequence (5' - 3')</b> |
|-------------------|----------------------------------|
| mc4r-F1           | GTCCTGCTCGCTGTAA                 |
| mc4r-R1           | CACGTTGTCCATGCTTTT               |
| mc4r-F2           | CGTGTTTGACTCTATGAT               |
| mc4r-R2           | TTTTACTTGGAGATTGTA               |
| mrp2-F1           | TGTTTTCAGATAGGCTTCG              |
| mrp2-R1           | ATCACCCATCCCAGAGG                |
| mrp2-F2           | TTCTTTGTTCTCACGCTG               |
| mrp2-R2           | TCTGTGCTTATCTGTTCC               |
| mc4r-qF           | TGCCAGTGAACAAGGACC               |
| mc4r-qR           | AGCAGCGACAACCAAGAT               |
| mrp2-qF           | TGTTCTCACGCTGCTCA                |
| mrp2-qR           | GCTTTGTCGTTTTTCATCT              |
| Tub $\alpha$ 1-qF | AGCCTGATGGTCAAATGC               |
| Tub $\alpha$ 1-qR | TTCCAATGGTGTAGTGCC               |

**Table S2.** Listing of MC4R sequences used in this study. Protein IDs are given to allow access to the protein sequence on Ensembl or GenBank website.

| Number | Species                            | Protein ID         |
|--------|------------------------------------|--------------------|
| 1      | <i>Xiphophorus nigrensis</i>       | ADO60278           |
| 2      | <i>Xiphophorus maculatus</i>       | NP_001303841       |
| 3      | <i>Xiphophorus multilineatus</i>   | ADO60279           |
| 4      | <i>Haplochromis burtoni</i>        | NP_001274332       |
| 5      | <i>Oreochromis niloticus</i>       | ENSONIP00000025763 |
| 6      | <i>Channa argus</i>                | AMM02541           |
| 7      | <i>Larimichthys crocea</i>         | XP_019120241       |
| 8      | <i>Dicentrarchus labrax</i>        | CBN82190           |
| 9      | <i>Takifugu porphyreus</i>         | BAB71733           |
| 10     | <i>Takifugu rubripes</i>           | AAO65551           |
| 11     | <i>Takifugu radiatus</i>           | BAB71732           |
| 12     | <i>Tetraodon nigroviridis</i>      | AAQ55178           |
| 13     | <i>Clupea harengus</i>             | XP_012679593       |
| 14     | <i>Cyprinus carpio</i>             | CBX89936           |
| 15     | <i>Ctenopharyngodon idella</i>     | AOZ60534           |
| 16     | <i>Squaliobarbus curriculus</i>    | ADV40875           |
| 17     | <i>Xenocypris argentea</i>         | ADV40878           |
| 18     | <i>Danio rerio</i>                 | NP_775385          |
| 19     | <i>Hypophthalmichthys molitrix</i> | ADV40873           |
| 20     | <i>Hypophthalmichthys nobilis</i>  | ADV40874           |
| 21     | <i>Astyanax mexicanus</i>          | ENSAMXP00000027055 |
| 22     | <i>Sus scrofa</i>                  | ABD28176           |
| 23     | <i>Homo sapiens</i>                | NP_005903          |
| 24     | <i>Canis lupus familiaris</i>      | EDL09662           |
| 25     | <i>Mus musculus</i>                | EDL09662           |
| 26     | <i>Ovis aries</i>                  | ACC77651           |
| 27     | <i>Bos taurus</i>                  | ACR43465           |
| 28     | <i>Ornithorhynchus anatinus</i>    | XP_001505445       |
| 29     | <i>Gallus gallus</i>               | AAT73771           |
| 30     | <i>Anolis carolinensis</i>         | XP_003226797       |

**Table S3.** Listing of MRAP2 sequences used in this study. Protein IDs are given to allow access to the protein sequence on Ensembl or GenBank website.

| Number | Species                         | Protein ID     |
|--------|---------------------------------|----------------|
| 1      | <i>Homo sapiens</i>             | NP_001333471.1 |
| 2      | <i>Mus musculus</i>             | NP_001346884.1 |
| 3      | <i>Ornithorhynchus anatinus</i> | XP_028903035.1 |
| 4      | <i>Gallus gallus</i>            | NP_001307836.1 |
| 5      | <i>Anolis carolinensis</i>      | XP_008119910.1 |
| 6      | <i>Xenopus tropicalis</i>       | XP_002933963.1 |
| 7      | <i>Channa argus</i>             | Present study  |
| 8      | <i>Callorhinchus milii</i>      | XP_007906624.1 |
| 9      | <i>Danio rerio</i>              | XP_001342923.4 |
| 10     | <i>Danio rerio</i>              | XP_005168578.1 |
| 11     | <i>Epinephelus coioides</i>     | MK425026.1     |
| 12     | <i>Esox lucius</i>              | XP_010888023.1 |
| 13     | <i>Larimichthys crocea</i>      | XP_027140224.1 |
| 14     | <i>Oreochromis niloticus</i>    | XP_003458293.2 |
| 15     | <i>Oryzias latipes</i>          | XP_004083625.1 |
| 16     | <i>Xiphophorus couchianus</i>   | XP_027897067.1 |
| 17     | <i>Xiphophorus maculatus</i>    | XP_005813802.1 |
